# Up-regulation of Intracellular Calcium Handling Underlies the Recovery of Endotoxemic Cardiomyopathy in Mice

Justin C. Morse, Joanne Huang, Natasha Khona, Edward J. Miller, M.D., Ph.D., Deborah A. Siwik, Ph.D., Wilson S. Colucci, M.D., Ion A. Hobai, M.D., Ph.D.

## ABSTRACT

**Background:** In surviving patients, sepsis-induced cardiomyopathy is spontaneously reversible. In the absence of any experimental data, it is generally thought that cardiac recovery in sepsis simply follows the remission of systemic inflammation. Here the authors aimed to identify the myocardial mechanisms underlying cardiac recovery in endotoxemic mice.

**Methods:** Male C57BL/6 mice were challenged with lipopolysaccharide (7  $\mu\text{g/g}$ , intraperitoneally) and followed for 12 days. The authors assessed survival, cardiac function by echocardiography, sarcomere shortening, and calcium transients (with fura-2-acetoxymethyl ester) in electrically paced cardiomyocytes (5 Hz, 37°C) and myocardial protein expression by immunoblotting.

**Results:** Left ventricular ejection fraction, cardiomyocyte sarcomere shortening, and calcium transients were depressed 12 h after lipopolysaccharide challenge, started to recover by 24 h (day 1), and were back to baseline at day 3. The recovery of calcium transients at day 3 was associated with the up-regulation of the sarcoplasmic reticulum calcium pump to  $139 \pm 19\%$  (mean  $\pm$  SD) of baseline and phospholamban down-regulation to  $35 \pm 20\%$  of baseline. At day 6, calcium transients were increased to  $123 \pm 31\%$  of baseline, associated with increased sarcoplasmic reticulum calcium load (to  $126 \pm 32\%$  of baseline, as measured with caffeine) and inhibition of sodium/calcium exchange (to  $48 \pm 12\%$  of baseline).

**Conclusions:** In mice surviving lipopolysaccharide challenge, the natural recovery of cardiac contractility was associated with the up-regulation of cardiomyocyte calcium handling above baseline levels, indicating the presence of an active myocardial recovery process, which included sarcoplasmic reticulum calcium pump activation, the down-regulation of phospholamban, and sodium/calcium exchange inhibition. (**ANESTHESIOLOGY 2017; 126:1125-38**)

PATIENTS with sepsis and septic shock may develop cardiac dysfunction (also known as sepsis-induced cardiomyopathy) that complicates their management and aggravates prognosis.<sup>1</sup> In surviving patients, sepsis-induced cardiomyopathy is spontaneously reversible within 7 to 10 days from the onset of sepsis.<sup>2,3</sup> In the absence of any experimental data, it is generally thought that the recovery of the heart function during sepsis resolution is due to the remission of the inciting inflammatory triggers.

Sepsis-induced cardiomyopathy develops primarily as the result of the dysregulation of myocardial  $\text{Ca}^{2+}$  handling,<sup>4</sup> including the dysfunction of the L-type  $\text{Ca}^{2+}$  channel,<sup>5,6</sup> the sarcoplasmic reticulum  $\text{Ca}^{2+}$  pump (SERCA),<sup>6,7</sup> and the sarcoplasmic reticulum  $\text{Ca}^{2+}$  release channels (ryanodine receptors).<sup>7,8</sup> We were curious to see what happens with the dysfunctional  $\text{Ca}^{2+}$  handling mechanisms during the recovery phase of sepsis-induced cardiomyopathy. We hypothesized that, if the resolution of cardiomyopathy was due to

### What We Already Know about This Topic

- Septic shock remains a major cause of morbidity and mortality and can be exacerbated by subsequent cardiomyopathy
- One remarkable feature of sepsis-induced cardiomyopathy is its spontaneous reversibility in surviving patients
- The molecular mechanisms related to the recovery phase of sepsis-induced cardiomyopathy are unknown

### What This Article Tells Us That Is New

- The authors have performed a functional and molecular assessment of myocardial calcium handling in surviving mice in a preclinical model of sepsis
- The authors have found a supernormal augmentation of heart function and myocytes calcium handling during the recovery phase of sepsis-induced cardiomyopathy that was associated with distinct changes in the expression and function of calcium-handling proteins in the heart
- The work suggests the existence of an active myocardial recovery mechanism in sepsis, with significant implications toward possible future therapies

Preliminary results have been presented in abstract form at the annual meeting of the Biophysical Society in San Francisco, California, February 14 to 19, 2014.

Submitted for publication July 3, 2016. Accepted for publication February 27, 2017. From the Department of Medicine, Section of Cardiovascular Medicine, Boston University Medical Center, Boston, Massachusetts (J.C.M., J.H., N.K., E.J.M., D.A.S., W.S.C., I.A.H.); Department of Radiology, Boston University Medical Center, Boston, Massachusetts (E.J.M.); Department of Anesthesiology, Critical Care and Pain Medicine, Massachusetts General Hospital, Boston, Massachusetts (I.A.H.); and Harvard University Medical School, Boston, Massachusetts (I.A.H.).

Copyright © 2017, the American Society of Anesthesiologists, Inc. Wolters Kluwer Health, Inc. All Rights Reserved. Anesthesiology 2017; 126:1125-38

the remission of systemic inflammation, then the  $\text{Ca}^{2+}$  transporters should recover gradually, from their initial decline, back to baseline levels, in parallel with the resolution of the inflammatory shock state.

## Materials and Methods

### Animals

Male C57BL/6 mice were purchased from Jackson Laboratory (USA) and studied at the age of 15 to 25 weeks (20 to 30 g).

### Sepsis Model

Lipopolysaccharide (LPS; Sigma, USA) was administered intraperitoneally at doses of 4 and 7  $\mu\text{g/g}$  of weight. A volume of 0.5 ml of warm (37°C), sterile normal saline was administered intraperitoneally with LPS to mitigate the ensuing hypovolemia. Mice were checked twice daily until the surviving mice recovered fully and showed normal mobility, feeding, and grooming behavior. Mice that showed diminished mobility were resuscitated with 0.5 ml of normal saline twice daily, intraperitoneally. At various times after LPS administration (from 12 h to 12 days), mice were euthanized with a pentobarbital overdose (10 mg intraperitoneally, together with 200 U of heparin).<sup>9</sup> After euthanasia, hearts were removed and used for cardiomyocyte isolation or immunoblotting. All of the animal procedures were conducted in accordance with guidelines published in the *Guide for the Care and Use of Laboratory Animals* (National Research Council, 1996) and approved by the Institutional Animal Care and Use Committee of Boston University School of Medicine (Boston, Massachusetts).

### Mortality Assessments

Mortality was assessed twice daily. Per Institutional Animal Care and Use Committee recommendations, mice that were found to be *in extremis* (immobile and showing agonal breathing) were euthanized and included in the mortality count at the time of assessment.

### Echocardiography

Two-dimensional and M-mode echocardiography of left ventricular function was performed in isoflurane anesthetized mice using a Vevo 770 high-resolution machine (Visual-Sonics, Canada) and a 30-MHz transducer, as described previously.<sup>10</sup> The primary outcome was left ventricle ejection fraction. Secondary outcomes included the total wall thickness of the left ventricle, measured as the sum of the anterior and posterior wall dimensions in diastole, and left ventricle internal diameter, which was also measured in diastole.

### Isolated Myocyte Studies

Isolation of cardiomyocytes, measurement of cell contractility and  $\text{Ca}^{2+}$  handling were performed as described previously.<sup>6</sup> Briefly, left ventricle cardiomyocytes were isolated

enzymatically, placed in a physiologic Tyrode solution (containing, in mM: NaCl 137.0, KCl 5.4,  $\text{CaCl}_2$  1.2,  $\text{MgCl}_2$  0.5, HEPES 10.0, glucose 5.0, and probenecid 0.5 [pH 7.40]) and externally paced at 37°C. Probenecid was added to the superfusing solution to increase fura-2 retention. Experiments shown here were performed at a pacing frequency of 5 Hz, with similar data being obtained at 2 Hz.

Cardiomyocyte sarcomere length and intracellular  $\text{Ca}^{2+}$  levels (using fura-2-acetoxymethyl ester, Molecular Probes, USA) were measured simultaneously using an integrated system (IonOptix, USA) featuring a HyperSwitch dual 340- to 380-nm excitation light source. Fura ratios recorded in cardiomyocyte are shown as raw signals, without attempting a calibration for free  $\text{Ca}^{2+}$ , due to uncertainties inherent to the calibration procedure.<sup>11</sup> We regularly perform an *in vitro* calibration using fura-2 K salt (Molecular Probes) to confirm the dynamic range of the  $\text{Ca}^{2+}$  imaging setup. Minimum  $R$  (measured using droplets of the Tyrode solution given above,  $\text{Ca}^{2+}$ -free, and with 1 mM EGTA) was  $0.93 \pm 0.01$ . Maximum  $R$  (Tyrode solution with 3 mM  $\text{Ca}^{2+}$ ) was  $4.27 \pm 0.58$ . The  $\beta$  coefficient ( $380 \text{ signal in } \text{Ca}^{2+}\text{-free}/\text{Ca}^{2+}\text{-bound}$ )<sup>12</sup> was  $2.10 \pm 0.32$  ( $n = 5$  measurements).

The primary outcomes of the cardiomyocyte experiments were the amplitude of sarcomere shortening and the amplitude of the  $\text{Ca}^{2+}$  transient ( $\Delta\text{Ca}_i$ ). Sarcomere shortening was expressed as the percentage of diastolic sarcomere length.  $\Delta\text{Ca}_i$  was measured as the difference between peak fura ratio and fura ratio at rest. Secondary outcomes were other parameters of cardiomyocyte contractility that offer insight into the underlying mechanisms. Sarcomere departure velocity ( $\Delta\text{SS}/\text{dt}$ ) and return velocity were measured as the maximal rate of sarcomere shortening and relaxation, respectively.  $\text{Ca}^{2+}$  rise velocity ( $\Delta\text{Ca}_i/\text{dt}$ ) was measured as the maximal rate of rise of the fura ratio. The time to peak of sarcomere shortening and of the  $\text{Ca}^{2+}$  transient were measured from the time of the pacing stimulus. Fura ratio decrease in diastole was fitted with a monoexponential curve, the time constant ( $\tau_{\text{Ca}}$ ) of which measures the activity of SERCA.<sup>6</sup> Diastolic sarcomere length and diastolic  $\text{Ca}_i$  levels were measured just before the following  $\text{Ca}_i$  transient. In some experiments, rapid application of 10 mM caffeine-containing Tyrode solution to individual cardiac cells was performed using a rapid solution exchanger, as described previously.<sup>6</sup>

### Immunoblotting

The expression of SERCA and phospholamban was measured with specific antibodies (MA3-919 and MA3-922, respectively; Thermo Fisher Scientific, Inc., USA) and normalized against the expression levels of glyceraldehyde 3-phosphate dehydrogenase (ab8245, Abcam, United Kingdom), as loading control, as we described previously.<sup>6</sup>

### Statistical Methods

**Experimental Groups.** We compared mice at baseline with mice challenged with LPS (either 7 or 4  $\mu\text{g/g}$ ) that were

euthanized at different time points after LPS administration. Mice were assigned to the different experimental groups unsystematically but without a formal randomization protocol. All mice that were assigned to the study groups were included in the analysis, and there were no exclusions. The observers were not blinded.

**Sample Size.** An *a priori* power analysis was not performed for this study. Instead we used sample sizes that previous studies indicated as sufficient to identify biologically meaningful differences. Mortality, echocardiography, and immunoblotting studies were performed on samples of five or more mice. Cardiomyocyte experiments were performed on sample sizes of 12 or more cells from two or more mice.

**Significance.** Multiple comparisons were performed using ANOVA tests followed by an unpaired Student's *t* test between different time points and baseline, with a Bonferroni correction for multiple comparisons (Microsoft Excel, USA).  $P < 0.05$  was considered significant. Survival analysis in figure 1 was performed using a Mantel–Cox test (GraphPad Prism 6.00 for Windows, USA). Values are shown as means  $\pm$  SDs.

## Results

### Administration of LPS Induces Dose-dependent Mortality

To study the recovery phase of LPS-induced cardiomyopathy, we first needed to find a suitable dose of LPS. In order for our studies to remain clinically relevant, we aimed to find

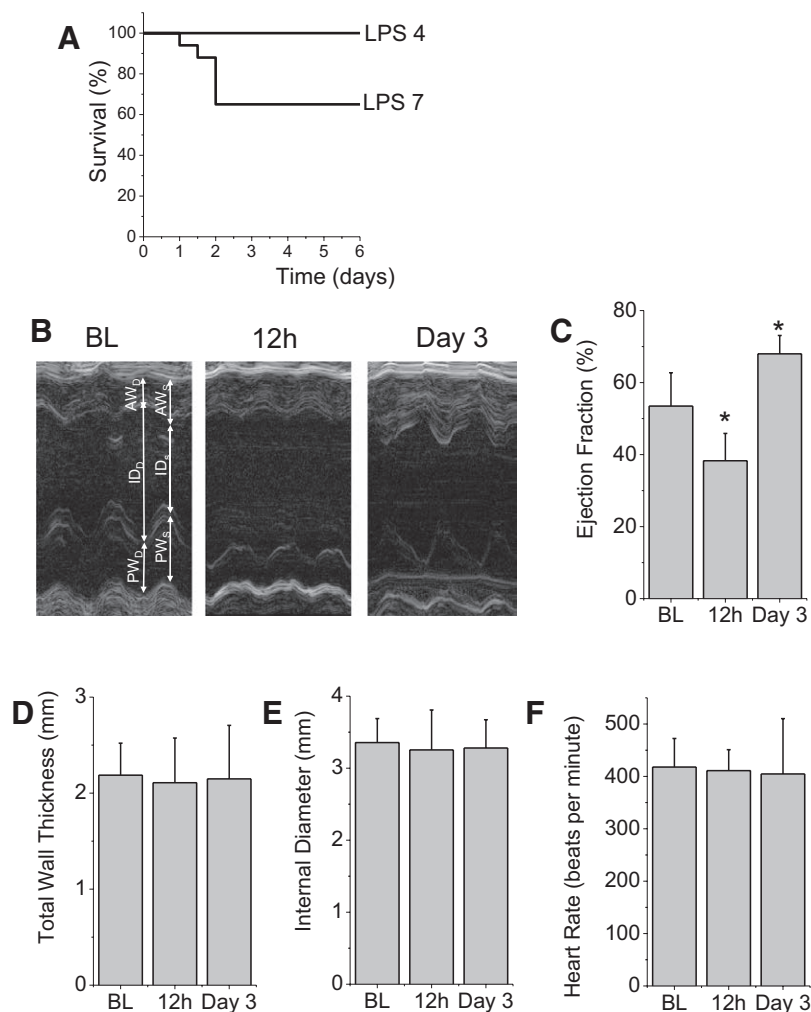

**Fig. 1.** Left ventricle ejection fraction is initially depressed and subsequently recovers after lipopolysaccharide (LPS) administration. (A) Kaplan–Meier diagram showing mice survival after challenge with LPS doses of 4 ( $n = 6$  mice) and 7  $\mu\text{g/g}$  ( $n = 17$  mice). (B) M-mode echocardiography stills for mice at baseline (BL; left), 12 h (middle), and 3 days (right) after administration of 7  $\mu\text{g/g}$  of LPS. Arrows show the main parameters measured: the systolic and diastolic anterior wall thickness ( $AW_S$  and  $AW_D$ , respectively), posterior wall thickness ( $PW_S$  and  $PW_D$ ), and left ventricle internal diameter ( $ID_S$  and  $ID_D$ ). Total wall thickness was calculated as  $AW_D + PW_D$ . Left ventricle ejection fraction was calculated from the  $ID_S$  and  $ID_D$  measurements, using VisualSonics (Canada) software. (C–F) Average results of a serial echocardiography study in a cohort of six mice that survived LPS challenge (7  $\mu\text{g/g}$ ). Studies were performed at baseline, 12 h after LPS administration, and at day 3. Data are shown as mean  $\pm$  SD. Data from mice that died before day 3 are not included in this analysis and are shown in figure 6. Shown are left ventricle ejection fraction (C), total wall thickness (D), and internal diameter (E). Heart rate (F) was similar between groups. \* $P < 0.05$  versus baseline.

a dose of LPS that induced a sufficiently severe disease, as indicated by the associated mortality and cardiomyopathy, with cardiomyocyte dysfunction. At the same time, to allow the study of survivors, the dose used had to be less than 100% lethal. *A priori*, we decided to find a dose of LPS that induces 30 to 50% mortality.

Mice were administered LPS (in various doses) and followed for 6 days (fig. 1A). A dose of 4  $\mu\text{g/g}$  of weight induced a mild inflammatory syndrome with no mortality. A dose of 7  $\mu\text{g/g}$  induced lethargy, piloerection, and hypothermia,<sup>6,9</sup> as well as 35% mortality by day 6. Therefore, most of the experiments (figs. 1–6) used a dose of 7  $\mu\text{g/g}$  of LPS.

### Left Ventricle Ejection Fraction Is Initially Depressed and Subsequently Increased after LPS Challenge

Cardiac contractile function was assessed by echocardiography in lightly anesthetized and volume-resuscitated mice. Figure 1B shows representative stills of a serial echocardiography study in a cohort of six mice that were administered LPS and survived by day 3. (Note that, for this experiment, the baseline and 12-h values are not representative for all of the mice enrolled. A comparison between baseline echocardiography results of survivor *vs.* nonsurvivor mice is shown in fig. 6.) Twelve hours after LPS administration, left ventricle ejection fraction was decreased to 72% of baseline ( $P = 0.028$ ; fig. 1C). By day 3, ejection fraction was not only restored but actually increased to 127% of baseline ( $P = 0.006$ ).

The total wall thickness of the left ventricle was unchanged at both 12 h after LPS and day 3, as compared with baseline (fig. 1D), indicating that no myocardial edema developed. Left ventricle internal diameter was also unchanged (fig. 1E), confirming that our empirical resuscitation protocol was effective, and there was no change in cardiac filling after LPS administration. The unchanged internal diameter also indicated that no cardiac dilation developed after LPS administration. To allow meaningful comparison, heart rate was similar between the groups at the time of echocardiography examination (fig. 1F).

The increased ejection fraction at day 3 *versus* baseline could be the result of an increase in myocardial contractility or due to other factors, such as a persistent vasodilation or increased sympathetic tone. To assess myocardial contractile function directly, we next measured sarcomere shortening and  $\Delta\text{Ca}_i$  in isolated cardiomyocytes.

### Sarcomere Shortening Depression and Recovery after LPS Challenge

Cardiomyocyte sarcomere shortening is the final output of the contractile process and the direct result of the activation of myofilament cross-bridge cycling by the  $\text{Ca}^{2+}$  transients (fig. 2A). Twelve hours after LPS administration, sarcomere shortening was decreased to 44% of baseline ( $P = 0.0011$ ; figs. 2A and B), which was consistent with our previous results.<sup>6</sup> Sarcomere shortening started to recover as soon as

24 h after LPS administration, although it was still less than baseline levels ( $P = 0.019$ ) at day 1. Sarcomere shortening continued to increase after day 1 and reached levels not significantly different from baseline between day 3 and day 12.

Sarcomere shortening is the product of  $\Delta\text{SS}/\text{dt}$  and the sarcomere time to peak.  $\Delta\text{SS}/\text{dt}$  (fig. 1C) was decreased at 12 h ( $P < 0.001$ ) and day 1 ( $P = 0.045$ ) after LPS administration and recovered to baseline values by day 3. Sarcomere time to peak (fig. 1D) was unchanged from baseline at all of the time points.

Sarcomere return velocity and diastolic sarcomere length are the cardiomyocyte determinants of the cardiac diastolic function and are result of the decay kinetics of the  $\text{Ca}^{2+}$  transient (measured directly by  $\tau_{\text{Ca}}$ , as detailed below), the elastic recoil of the titin myofilaments,<sup>13</sup> and cardiomyocyte viscosity.<sup>14</sup> Sarcomere return velocity was depressed at 12 h after LPS administration ( $P < 0.001$ ), recovered by day 1, and not significantly different from baseline between days 1 and 12. Diastolic sarcomere length was largely unchanged from baseline at any time after LPS administration, with the exception of a small increase (2%;  $P = 0.010$ ) at day 6.

### Cardiomyocyte $\Delta\text{Ca}_i$ Depression, Recovery, and Subsequent Up-regulation after LPS Challenge

$\Delta\text{Ca}_i$  is the final result of cardiomyocyte  $\text{Ca}^{2+}$  handling and an immediate determinant of the myocardial contractile force. Twelve hours after LPS administration,  $\Delta\text{Ca}_i$  was decreased to 76% of baseline ( $P = 0.0036$ ; figs. 3A and B), which was consistent with previous findings.<sup>6</sup> By day 1,  $\Delta\text{Ca}_i$  started to recover and continued to increase gradually between days 1 and 6. By day 6,  $\Delta\text{Ca}_i$  reached levels that were significantly higher (124%) than baseline ( $P = 0.038$ ). By day 12,  $\Delta\text{Ca}_i$  returned to baseline values.

$\Delta\text{Ca}_i$  is the product of  $\Delta\text{Ca}_i/\text{dt}$  and  $\text{Ca}^{2+}$  transient time to peak.  $\Delta\text{Ca}_i/\text{dt}$  measures the rate of  $\text{Ca}^{2+}$  release from the sarcoplasmic reticulum.  $\Delta\text{Ca}_i/\text{dt}$  was depressed at 12 h after LPS administration ( $P < 0.001$ ) and day 1 ( $P = 0.026$ ) and recovered to baseline levels at day 3 and beyond (fig. 3C).

The time to peak of the  $\text{Ca}_i$  transient contributes to peak  $\Delta\text{Ca}_i$  and is determined largely by the opening times of the ryanodine receptors. The time to peak was slightly prolonged at 12 h ( $P = 0.0053$ ) and day 4 ( $P < 0.001$ ) and unchanged from baseline at all of the other time points (fig. 3D).

### SERCA Depression, Recovery, and Subsequent Up-regulation after LPS Challenge

In the conditions used here, the large majority (more than 95%) of diastolic  $\text{Ca}^{2+}$  decay is the result of  $\text{Ca}^{2+}$  reuptake into the sarcoplasmic reticulum by SERCA.<sup>6</sup> As such,  $\tau_{\text{Ca}}$  is an accurate measure of SERCA function, one of the major  $\text{Ca}^{2+}$  transporters in the heart and a main determinant of cardiac systolic and diastolic properties. Twelve hours after LPS administration,  $\tau_{\text{Ca}}$  was increased to 113% of baseline, signifying a 12% inhibition of SERCA function (with borderline significance,  $P = 0.097$ ). This was consistent with previous findings in our laboratory

that demonstrated that SERCA is inhibited after LPS challenge in male mice, in a dose-dependent fashion.<sup>6</sup>

Importantly, SERCA function started to recover soon after the 12-h time point, and, by day 3,  $\tau_{Ca}$  was less than baseline, signifying an increase in SERCA function to 139% of baseline ( $P < 0.001$ ). By day 4,  $\tau_{Ca}$  was back to baseline values, where it remained between days 4 and 12.

The diastolic level of  $Ca_i$  is the direct consequence of  $Ca^{2+}$  decay kinetics and a direct determinant of the cardiac diastolic properties. The diastolic  $Ca^{2+}$  level was largely unchanged between groups, with the exception of a small decrease at day 3 ( $P = 0.034$ ), consistent with the up-regulated SERCA at this time point, and a small increase at day 6

( $P = 0.034$ ), consistent with the  $Na^+/Ca^{2+}$  exchange inhibition observed at that time point (see below).

### Phospholamban Down-regulation Underlies SERCA Up-regulation at Day 3

To identify the mechanisms responsible for SERCA up-regulation at day 3, we measured the expression levels of SERCA and phospholamban, the SERCA main regulatory subunit that exerts a tonic inhibitory effect.<sup>15</sup> Glycerinaldehyde 3-phosphate dehydrogenase served as a loading control. We compared mice at baseline, 12h after LPS administration (when SERCA function reached the nadir), and at day 3, when SERCA reached peak function. SERCA

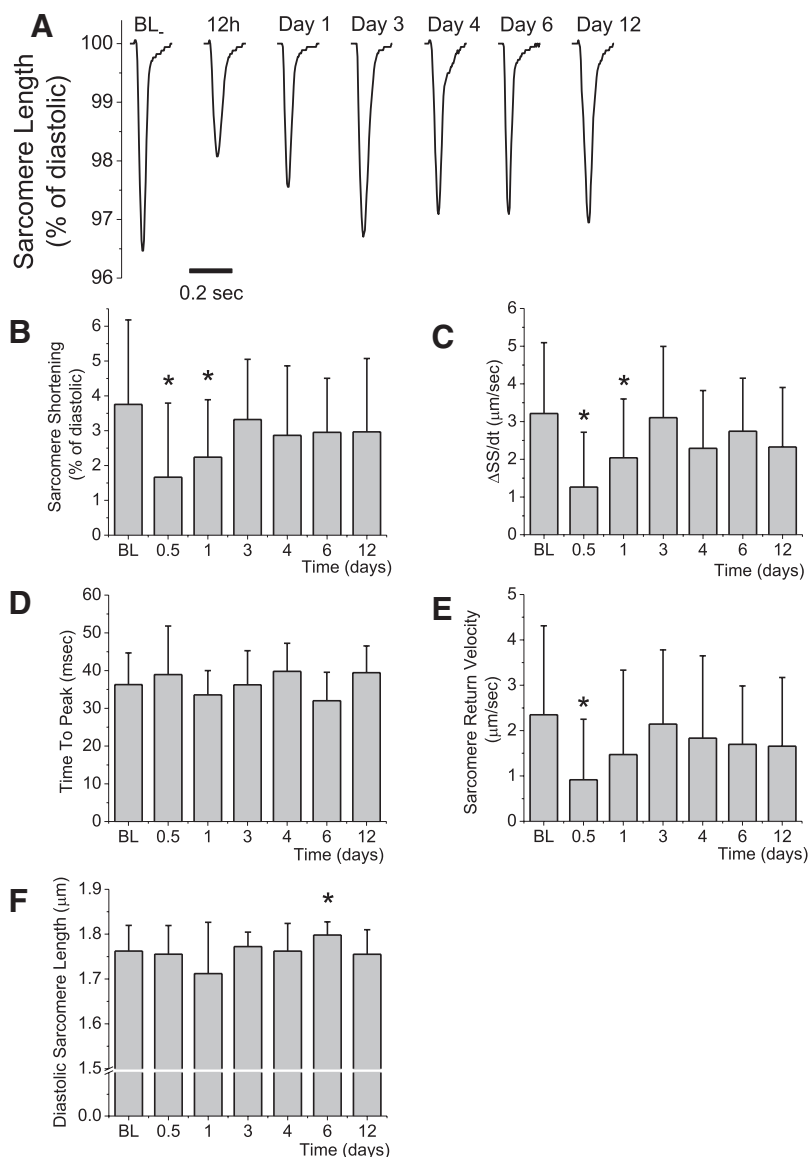

**Fig. 2.** The depression and recovery of sarcomere shortening after lipopolysaccharide (LPS) administration. (A) Typical experimental recordings of sarcomere shortening in isolated, externally paced cardiomyocytes at baseline and at different times after LPS administration (7  $\mu$ g/g). (B–E) Average sarcomere shortening (B), sarcomere departure velocity ( $\Delta SS/dt$ ; C), sarcomere time to peak (D), return velocity (E), and diastolic sarcomere length (F) at baseline and at different times after LPS administration. Data are shown as mean  $\pm$  SD. N = 42 cells from seven mice at baseline (42/7), 45/5 for 12 h, 18/2 for day 1, 38/4 for day 3, 19/2 for day 4, 17/3 for day 6, and 16/2 for day 12. BL = baseline. \* $P < 0.05$  versus baseline.

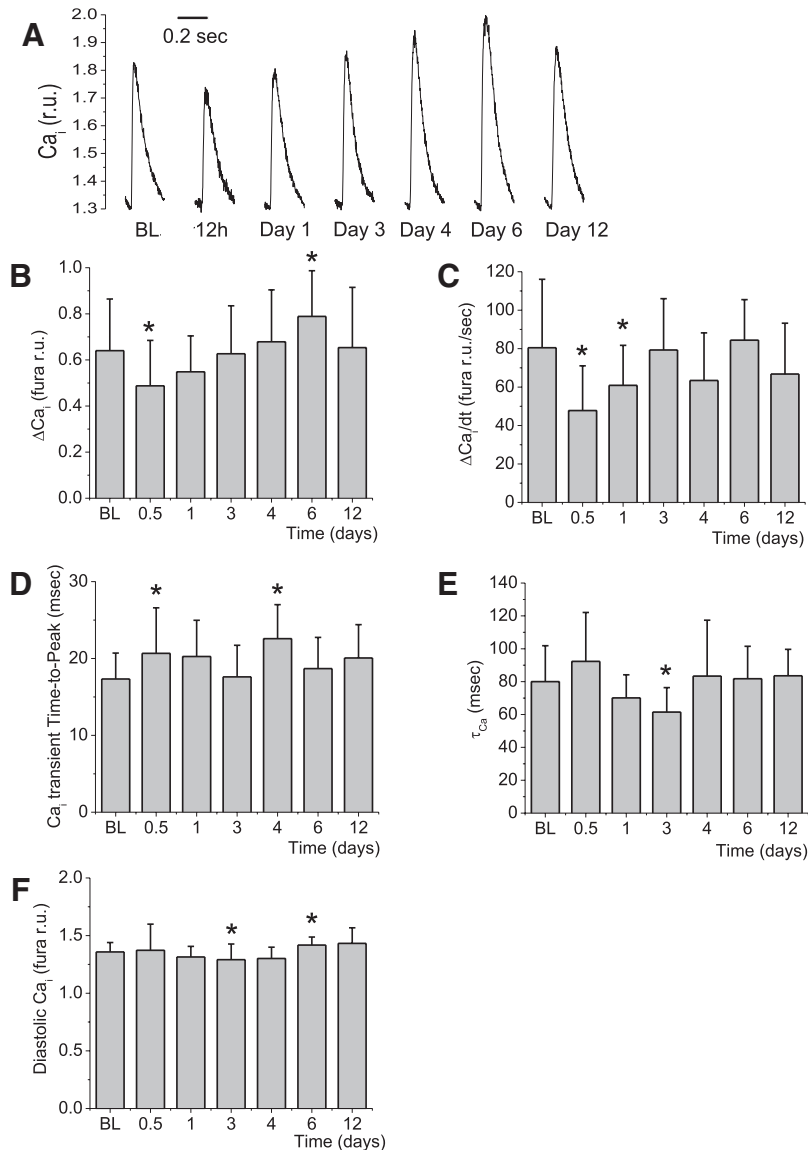

**Fig. 3.** The depression, recovery, and subsequent up-regulation of the  $Ca^{2+}$  transient ( $\Delta Ca_i$ ) after lipopolysaccharide (LPS) administration. (A) Typical experimental recordings of  $Ca_i$  transients in isolated, externally paced cardiomyocytes at baseline and at different times after LPS administration (as shown). (B–E) Average  $\Delta Ca_i$  (B),  $Ca^{2+}$  rise velocity ( $\Delta Ca_i/dt$ ; C),  $Ca_i$  transient time to peak (D), time constant of  $Ca^{2+}$  decay ( $\tau_{Ca_i}$ ; E), and diastolic  $Ca_i$  levels (F) in cells isolated from mice at baseline and at different times after LPS administration. Data are shown as mean  $\pm$  SD. N = 42 cells from seven mice at baseline (42/7) at baseline, 45/5 for 12h, 18/2 for day 1, 38/4 for day 3, 19/2 for day 4, 17/3 for day 6, and 16/2 for day 12. BL = baseline; r.u. = ratiometric units. \* $P < 0.05$  versus baseline.

and phospholamban expression were unchanged 12h after LPS challenge, which is consistent with previous findings.<sup>6</sup> At day 3, SERCA expression was unchanged, but phospholamban was down-regulated to 35% of baseline ( $P = 0.0019$ ). Therefore, we concluded that SERCA activation at day 3 is likely the result of phospholamban down-regulation.

#### **Sarcoplasmic Reticulum $Ca^{2+}$ Load ( $Ca_{SR}$ ) Is Increased and the $Na^+/Ca^{2+}$ Exchange Is Inhibited at Day 6**

To gain additional insights into the mechanisms governing myocardial  $Ca^{2+}$  handling, we measured  $Ca_{SR}$ , sarcoplasmic reticulum fractional release function, as well as the activity of

the sarcolemmal  $Na^+/Ca^{2+}$  exchange and L-type  $Ca^{2+}$  channel using rapid applications of caffeine. For this analysis, we focused on the most noteworthy time points after LPS administration: 12h, when sarcomere shortening,  $\Delta Ca_i$ , and SERCA function reached their lowest points; day 3, when  $\Delta Ca_i$  was recovered to baseline and SERCA was maximally activated; and day 6, when  $\Delta Ca_i$  reached its supranormal levels as compared with baseline.

Cells were paced until steady state, then pacing was stopped and caffeine was rapidly applied using a home-built rapid solution exchanger (fig. 5A). Caffeine, a ryanodine receptor opener,<sup>16</sup> causes all  $Ca^{2+}$  ions stored in the sarcoplasmic

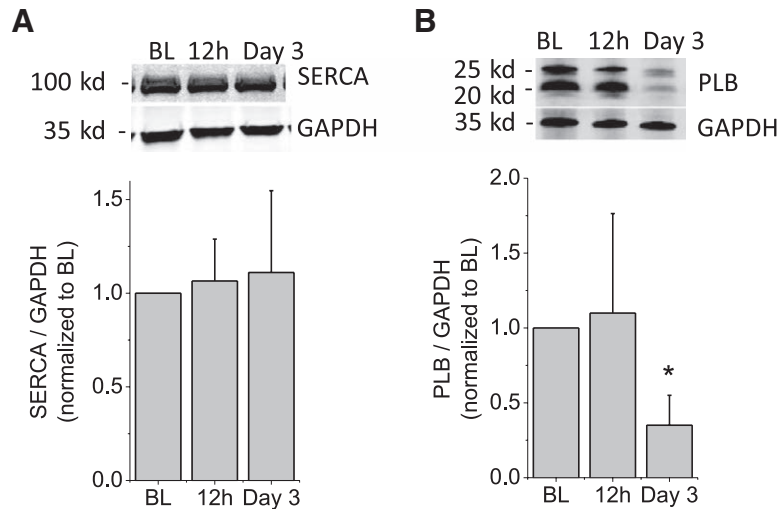

**Fig. 4.** Phospholamban is down-regulated at day 3. Sarcoplasmic reticulum  $\text{Ca}^{2+}$  pump (SERCA; A) and phospholamban (PLB; B) expression in mice at baseline, 12 h after lipopolysaccharide (LPS) administration, and at day 3. *Upper panels* show illustrative Western blots of SERCA, phospholamban, and glyceraldehyde 3-phosphate dehydrogenase (GAPDH) in left ventricle extracts. *Lower panels* shown average data, normalized to GAPDH (loading control), and shown as a ratio of baseline.  $N = 6$  hearts each. Phospholamban was visualized in the pentameric (25 kilodalton [kd]) and tetrameric forms (20 kd). Average data shown are for the predominant 20-kd isoform, and similar results were obtained for the 25-kd isoform. Data are shown as mean  $\pm$  SD. BL = baseline. \* $P < 0.05$  versus baseline.

reticulum to be released into the cytosol. As such, the amplitude of the caffeine-induced  $\text{Ca}_i$  transient is a measure of  $\text{Ca}_{\text{SR}}$ .  $\text{Ca}_{\text{SR}}$  was unchanged from baseline at 12 h and day 3 but was increased to 126% of baseline at day 6 ( $P = 0.034$ ), the time point when  $\Delta\text{Ca}_i$  also reached maximal values (figs. 5B and C).

During caffeine application, the sarcoplasmic reticulum ryanodine receptors are kept open, SERCA cannot effectively reuptake cytosolic  $\text{Ca}^{2+}$ , and therefore  $\text{Ca}^{2+}$  removal is largely the result of trans-sarcolemmal extrusion *via* forward mode of the  $\text{Na}^+/\text{Ca}^{2+}$  exchange. As such, the time constant of  $\text{Ca}^{2+}$  decay during caffeine application ( $\tau_{\text{Caff}}$ ) measures the activity of the  $\text{Na}^+/\text{Ca}^{2+}$  exchange.  $\tau_{\text{Caff}}$  was unchanged at 12 h after LPS administration (fig. 5E), which was consistent with previous findings.<sup>6</sup>  $\tau_{\text{Caff}}$  was also unchanged at day 3 but profoundly increased at day 6 ( $P < 0.001$ ), signifying an inhibition of  $\text{Na}^+/\text{Ca}^{2+}$  exchange activity to 49% of baseline at this time point.  $\text{Na}^+/\text{Ca}^{2+}$  exchange inhibition is likely the mechanism underlying the increase in  $\text{Ca}_{\text{SR}}$  observed at day 6 (see Discussion).

#### Sarcoplasmic Reticulum Fractional Release and L-type $\text{Ca}^{2+}$ Channel Function Are Depressed 12 h after LPS Administration and Recovered by Day 3

The fractional release function of the sarcoplasmic reticulum represents how much of the available  $\text{Ca}^{2+}$  is released during a paced action potential. Fractional release was measured as the ratio of pacing-induced  $\Delta\text{Ca}_i/\text{Ca}_{\text{SR}}$ , as illustrated in figure 5A. At 12 h after LPS administration, fractional release was decreased by 23% of baseline ( $P < 0.001$ ), which is consistent with our previous results.<sup>6</sup> Fractional release was fully recovered by day 3 and also similar to baseline at day 6 (fig. 5E).

Mechanistically, fractional release is determined primarily by the amount of  $\text{Ca}^{2+}$  that enters the cell *via* the L-type  $\text{Ca}^{2+}$  channels

during the depolarization phase of the action potential ( $\Delta\text{Ca}_{\text{entry}}$ ) and triggers the opening of the ryanodine receptors and  $\text{Ca}^{2+}$ -induced  $\text{Ca}^{2+}$  release.<sup>17</sup>  $\Delta\text{Ca}_{\text{entry}}$  was measured as the amplitude of the first  $\Delta\text{Ca}_i$  elicited by resuming external pacing after a caffeine application (figs. 5A and F). In these conditions, after caffeine wash-off, all of the  $\text{Ca}^{2+}$  stored in the sarcoplasmic reticulum has been released and removed from the cell *via* forward  $\text{Na}^+/\text{Ca}^{2+}$  exchange. In the absence of any more  $\text{Ca}^{2+}$  release from the sarcoplasmic reticulum, the first  $\text{Ca}^{2+}$  transient recorded when pacing resumes is a reflection of the amount of  $\text{Ca}^{2+}$  ions that enter the cell *via* L-type  $\text{Ca}^{2+}$  channels during the triggered action potential (fig. 5F). In a previous study, we validated this assay of L-type  $\text{Ca}^{2+}$  channel function against the commonly used patch clamp method.<sup>6</sup> As compared with patch clamp, however, measuring  $\Delta\text{Ca}_{\text{entry}}$  offers two distinct advantages: first it can be used in intact cells, and, second, it measures directly the amount of  $\text{Ca}^{2+}$  entering the cell during the action potential, which represents the physiologic trigger of sarcoplasmic reticulum  $\text{Ca}^{2+}$  release. In contrast, the patch clamp method measures the ionic current carried during imposed square voltage pulses, in cells in which the intracellular milieu has been exchanged by the pipette solution.

Consistent with previous studies,<sup>6</sup>  $\Delta\text{Ca}_{\text{entry}}$  was decreased to 54% at 12 h after LPS administration ( $P < 0.001$ ).  $\Delta\text{Ca}_{\text{entry}}$  was fully recovered at day 3 but was decreased again at day 6 ( $P < 0.0022$ ).

#### Baseline Left Ventricle Ejection Fraction Is Not Different between Mice That Survived LPS Challenge and Mice That Died

One unavoidable caveat of our study design was the fact that 35% of mice enrolled died between 12 h and day 2 (fig. 1A). As such, the groups of mice studied after 12 h are different

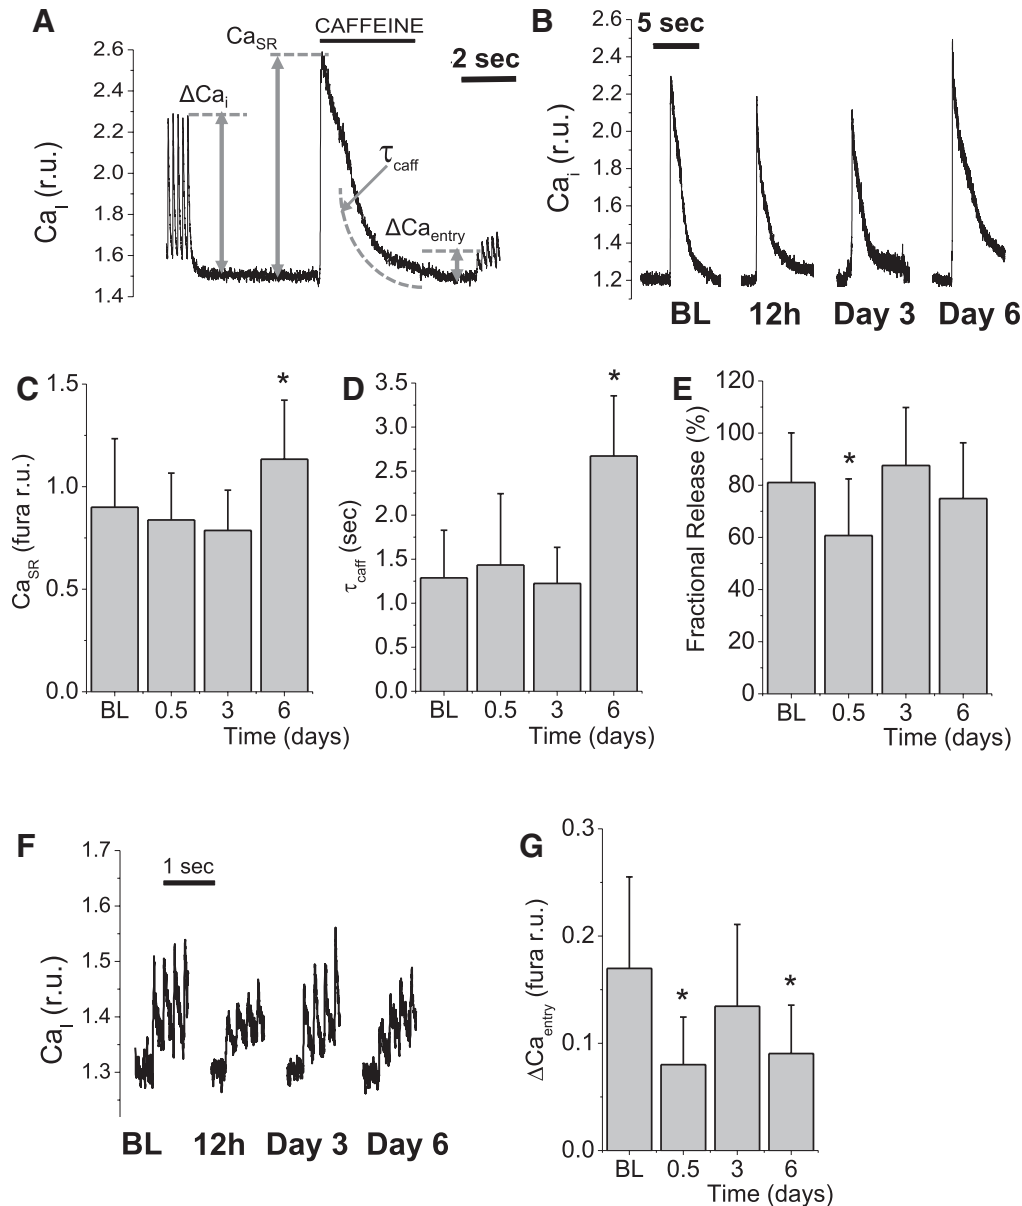

**Fig. 5.** Sarcoplasmic reticulum,  $Na^+/Ca^{2+}$  exchange and L-type  $Ca^{2+}$  channel function at baseline and after lipopolysaccharide (LPS) administration. (A) Typical experimental recording of caffeine application, at rest, after a train of external pacing, and the quantification of the main parameters measured.  $\Delta Ca_i$  is the steady-state amplitude of triggered  $Ca^{2+}$  transients. Sarcoplasmic reticulum  $Ca^{2+}$  load ( $Ca_{SR}$ ) was measured as the amplitude of the caffeine-induced  $Ca^{2+}$  transient. The time constant of  $Ca^{2+}$  decay during caffeine application ( $\tau_{caff}$ ) is a measure of  $Na^+/Ca^{2+}$  exchange activity. Sarcoplasmic reticulum fractional release was calculated as  $\Delta Ca_i / Ca_{SR}$ .  $Ca^{2+}$  entry via the L-type  $Ca^{2+}$  channels ( $\Delta Ca_{entry}$ ) was measured as the amplitude of the first  $Ca^{2+}$  transient elicited by external pacing after caffeine wash-off. (B) Typical caffeine-induced  $Ca_i$  transients at baseline, 12h after LPS administration, at day 3, and at day 6. (C–E) Average  $Ca_{SR}$  (C),  $\tau_{caff}$  (D), and sarcoplasmic reticulum fractional release (E) at baseline and at different times after LPS. Data are shown as mean  $\pm$  SD.  $N = 25$  cells from five mice at baseline (25/5), 28/5 for 12h, 21/4 for day 3, and 16/3 for day 6. (F) Representative traces of first (measuring  $\Delta Ca_{entry}$ ) and subsequent  $Ca_i$  transients elicited by external pacing after caffeine wash-off. (G) Average  $\Delta Ca_{entry}$  at baseline, 12h after LPS administration, at day 3, and at day 6.  $N = 22$  cells from six mice at baseline (22/6), 24/5 for 12h, 16/4 for day 3, and 12/3 for day 6. BL = baseline; r.u. = ratiometric units. \* $P < 0.05$  versus baseline.

from the mice studied at baseline. Could it be possible that the differences that we recorded at days 3 and 6 were the result of a survival bias? In other words, could cardiac contractile function be different in mice that survived and mice that died after LPS challenge? The following two experiments (figs. 6–8) were performed to answer this question.

First we compared baseline echocardiography parameters between mice that survived LPS challenge and mice that died (fig. 6). For this experiment, a cohort of 12 mice were studied by echocardiography (fig. 6A), then challenged with LPS and followed for 6 days. Five mice died and seven mice survived. When we compared the baseline echocardiography



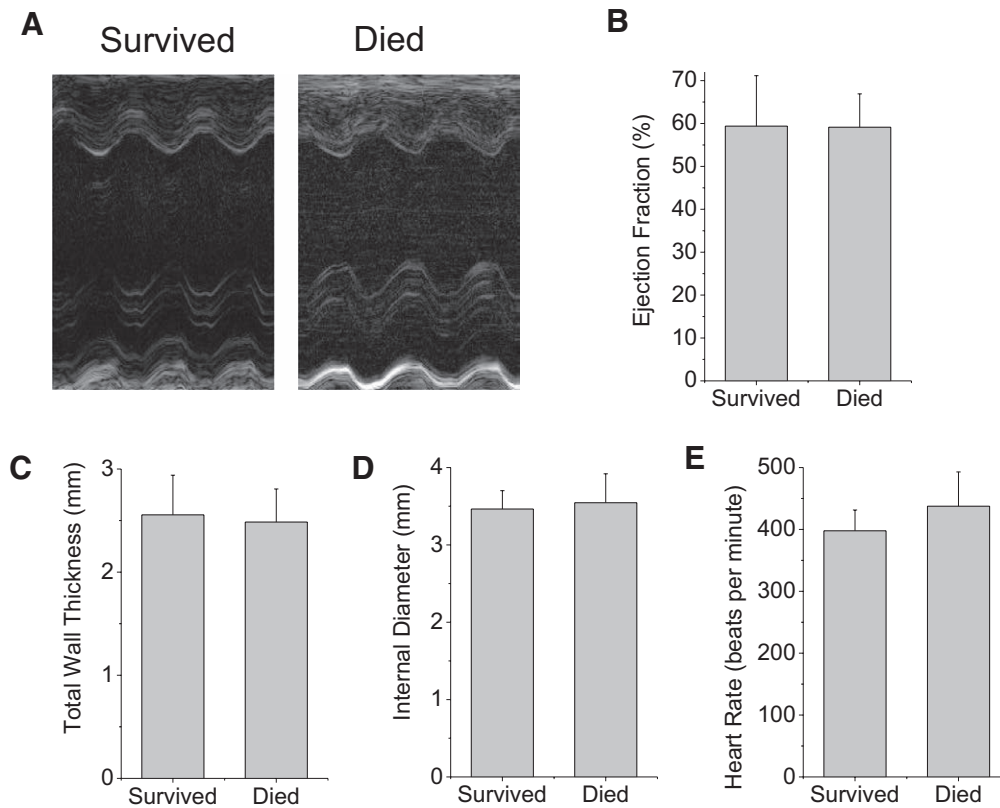

**Fig. 6.** Baseline left ventricle ejection fraction was not different between survivor and nonsurvivor mice. A cohort of 12 mice had echocardiography studies at baseline, and then were administered lipopolysaccharide (LPS) and followed for 6 days. We compared baseline echocardiography parameters between mice that survived LPS challenge *versus* mice that died. (A) Typical echocardiography stills of a mouse that survived *versus* a mouse that died. (B–E) Average baseline left ventricle ejection fraction (B), total wall thickness (C), internal diameter (D), and heart rate (E) in mice that survived ( $n = 7$ ) *versus* mice that died ( $n = 5$ ).

characteristics, left ventricle ejection fraction (fig. 6B), total wall thickness (fig. 6C), and internal diameter (fig. 6D) were similar in mice that died and mice that survived the LPS challenge. For a meaningful comparison, heart rate was similar between the groups at the time of the echocardiography examination (fig. 6E). Therefore, we concluded that baseline cardiac function was similar in mice that survived and mice that died after LPS challenge, at least as far as echocardiography can indicate.

#### **Cardiomyocyte Sarcomere Shortening and $\Delta Ca_i$ Up-regulation after Challenge with 4 $\mu\text{g/g}$ of LPS**

Next we studied cardiomyocyte contractile function (fig. 7A) after challenge with a dose of 4  $\mu\text{g/g}$  of LPS, which does not induce mortality (as shown in fig. 1A). *A priori*, we chose to study the most noteworthy time points from the previous experiment (that used 7  $\mu\text{g/g}$  of LPS; figs. 1–4) and compared them to baseline: (1) at 12 h after LPS administration, when sarcomere shortening,  $\Delta Ca_i$ , and SERCA function reached their lowest points; (2) day 3, when SERCA was maximally activated; and (3) day 6, when  $\Delta Ca_i$  reached its supranormal levels.

Cardiomyocyte sarcomere shortening (fig. 7B) was depressed at 12 h after LPS administration ( $P < 0.001$ ; fig. 7B). Importantly, sarcomere shortening was increased

to 138% of baseline at day 3 ( $P = 0.031$ ). At day 6, sarcomere shortening was not significantly different than baseline.  $\Delta S/dt$  and sarcomere return velocity showed the same time course as sarcomere shortening, being depressed at 12 h after LPS ( $P < 0.001$  for both), augmented to above baseline levels by day 3 ( $P = 0.014$  and 0.020, respectively), and not significantly different from baseline at day 6 (fig. 7C). Sarcomere time to peak was shorter than baseline at 12 h ( $P < 0.001$ ) and unchanged from baseline at days 3 and 6 (fig. 7E). Diastolic sarcomere length was similar to baseline at 12 h and day 6 and showed a small (2%;  $P = 0.003$ ) increase at day 3.

Cardiomyocyte  $\Delta Ca_i$  was not decreased 12 h after challenge with LPS (fig. 8A), which is consistent with previously published studies<sup>18</sup> that indicated that, after this dose, the contractile deficit induced by low doses of LPS is due to a decrease in myofilament sensitivity for  $Ca^{2+}$ , in the absence of changes in intracellular  $Ca^{2+}$  fluxes. Despite that, at day 3,  $\Delta Ca_i$  was up-regulated to 120% of baseline ( $P = 0.028$ ). At day 6,  $\Delta Ca_i$  was again similar to baseline (fig. 8A).  $\Delta Ca_i/dt$  (fig. 8B),  $\tau_{Ca}$  (fig. 8C),  $Ca_i$  transient time to peak (fig. 8D), and the level of diastolic  $Ca^{2+}$  (fig. 8E) were unchanged from baseline at all of the time points studied.

In conclusion, the up-regulation of  $Ca^{2+}$  handling during the recovery phase of LPS-induced cardiomyopathy was also

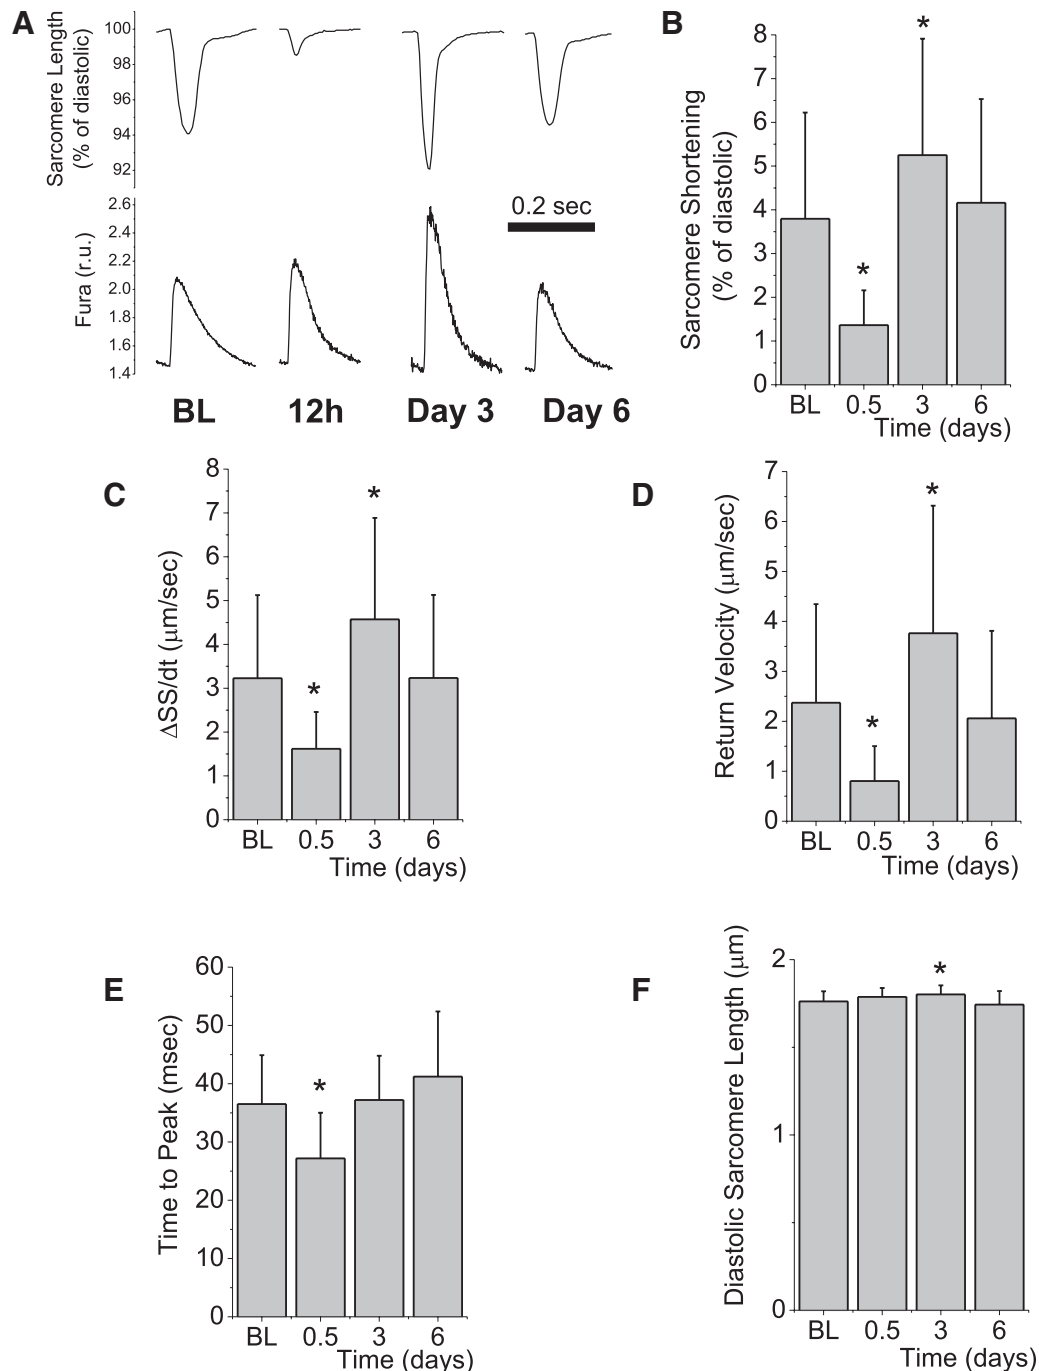

**Fig. 7.** Cardiomyocyte sarcomere shortening depression and subsequent up-regulation after challenge with 4 µg/g of lipopolysaccharide (LPS). (A) Typical experimental recordings of sarcomere shortening and  $Ca_i$  transients in cardiomyocytes isolated at baseline and at different times (as shown) after challenge with 4 µg/g of LPS. (B–E) Average sarcomere shortening (B), sarcomere departure velocity ( $\Delta SS/dt$ ; C), return velocity (D), sarcomere time to peak (E), and diastolic sarcomere length (F) at baseline, 12 h after LPS administration, at day 3, and at day 6. Data are shown as mean  $\pm$  SD.  $N = 37$  cells from seven mice at baseline (37/7), 17/2 for 12h, 39/3 for day 3, and 14/2 for day 6. BL = baseline; r.u. = ratiometric units. \* $P < 0.05$  versus baseline.

observed after a dose of 4 µg/g, which induced no mortality. Compared to the challenge with 7 µg/g,  $\Delta Ca_i$  up-regulation occurred earlier (day 3 as compared with day 6) in the absence of SERCA up-regulation and was associated with a significant increase in sarcomere shortening.

## Discussion

This is the first investigation of the mechanisms underlying the spontaneous recovery of sepsis-induced cardiomyopathy. Currently, it is generally believed that the resolution of cardiac dysfunction in sepsis is simply due to

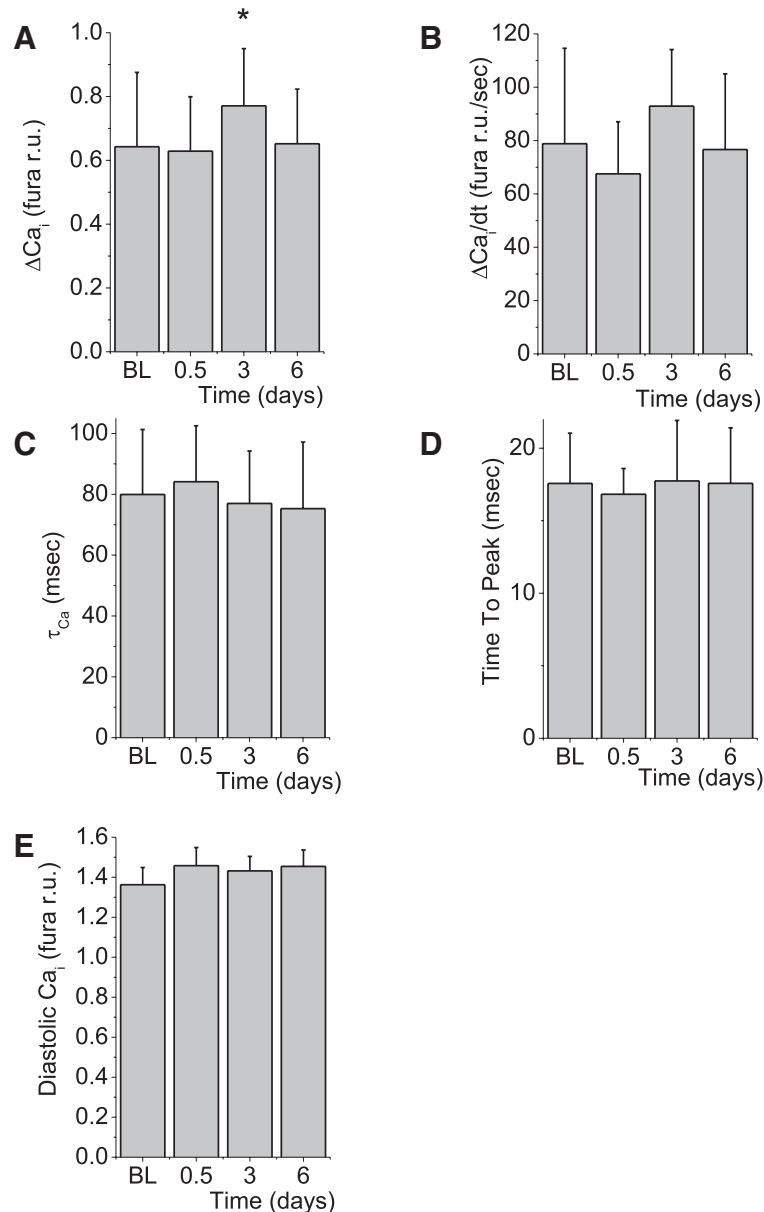

**Fig. 8.** Cardiomyocyte  $Ca^{2+}$  transient ( $\Delta Ca_i$ ) depression and subsequent up-regulation after challenge with 4  $\mu g/g$  of lipopolysaccharide (LPS). Average  $\Delta Ca_i$  (A),  $Ca^{2+}$  rise velocity ( $\Delta Ca_i/dt$ ; B), time constant of  $Ca^{2+}$  decay ( $\tau_{Ca}$ ; C),  $Ca_i$  transient time to peak (D), and diastolic  $Ca_i$  levels (E) at baseline, 12h after LPS administration, at day 3, and at day 6. Data are shown as mean  $\pm$  SD. N = 37 cells from seven mice at baseline (37/7), 17/2 for 12h, 39/3 for day 3, and 14/2 for day 6. BL = baseline; r.u. = ratiometric units. \* $P < 0.05$  versus baseline.

the remission of systemic inflammation. We hypothesized that, if this was the case, then the efficiency of intracellular  $Ca^{2+}$  handling should recover gradually, from its initial decline, back to baseline levels, in parallel with the resolution of the inflammatory shock. Instead, we found that, 6 days after the inception of sepsis-induced cardiomyopathy,  $\Delta Ca_i$  overshoots baseline, suggesting that  $\Delta Ca_i$  recovery is not a passive process but rather the result of active myocardial mechanisms. Three such mechanisms were found here: SERCA activation, as the result of phospholamban down-regulation, and the down-regulation of  $Na^+/Ca^{2+}$  exchange.

### **Myocardial $Ca^{2+}$ Handling Is Up-regulated in the Recovery Phase of LPS-induced Cardiomyopathy**

Before cardiac recovery began, at 12h after administration of 7  $\mu g/g$  of LPS,<sup>6</sup> the presence of cardiomyopathy was indicated by the depression of the left ventricle ejection fraction, cardiomyocyte sarcomere shortening (fig. 2B), and  $\Delta Ca_i$  (fig. 3B). In surviving mice, 3 days after LPS administration, cardiomyocyte sarcomere shortening and  $\Delta Ca_i$  were fully recovered, whereas left ventricle ejection fraction was increased to levels above normal. The apparent hypercontractility observed at day 3 is thus likely the result of extramyocardial factors,

such as an increased sympathetic tone or a persistent degree of vasodilation, with the associated decrease in cardiac afterload.

Importantly,  $\Delta\text{Ca}_i$  continued to increase after day 3 and reached levels above normal at day 6. This up-regulation of myocardial  $\text{Ca}^{2+}$  handling was, in itself, inconsistent with the initial hypothesis that the recovery of cardiac function is simply due to the remission of systemic inflammation. Instead, it suggested the existence of distinct myocardial recovery mechanisms, which are different from those responsible for the initial depression of  $\Delta\text{Ca}_i$ .

### Phospholamban Down-regulation and SERCA Up-regulation at Day 3 after LPS Challenge

Previously,<sup>6</sup> we found that challenge with 25  $\mu\text{g/g}$  of LPS induces SERCA inhibition at 12 h, associated with a depression of  $\text{Ca}_{\text{SR}}$ . In these conditions, SERCA inhibition occurred as the result of oxidative modifications (sulphonylation) of one reactive thiol, at cysteine-674, and in the absence of any changes in SERCA expression or the expression levels and phosphorylation state of phospholamban.<sup>6</sup>

Here we used a lower dose of 7  $\mu\text{g/g}$  of LPS and observed a similar trend toward SERCA inhibition and  $\text{Ca}_{\text{SR}}$  depression at 12 h. Importantly, the initial SERCA down-regulation reversed quickly and by day 3 generated a transport rate that was greater than baseline, as indicated by the shortened  $\tau_{\text{Ca}}$ . SERCA up-regulation at day 3 was likely the result of a decrease in phospholamban expression, which would decrease SERCA tonic inhibition and induce a positive inotropic effect.<sup>19,20</sup> The signaling pathways underlying phospholamban down-regulation at day 3 are yet unknown.

### $\text{Na}^+/\text{Ca}^{2+}$ Exchange Down-regulation Additionally Supports $\Delta\text{Ca}_i$ Recovery

The down-regulation of  $\text{Na}^+/\text{Ca}^{2+}$  exchange function at day 6 is consistent with previous findings in two other models of sepsis-induced cardiomyopathy.<sup>8,21</sup> It is important to realize that  $\text{Na}^+/\text{Ca}^{2+}$  exchange down-regulation would exert a positive inotropic effect in the diseased myocardium<sup>22</sup> by partially opposing SERCA inhibition and increasing  $\text{Ca}_{\text{SR}}$ .<sup>22</sup> In fact, one author (I.A.H.) has previously proposed  $\text{Na}^+/\text{Ca}^{2+}$  exchange inhibition as a novel therapeutic intervention in congestive heart failure.<sup>22–24</sup> It was exciting, therefore, to find that  $\text{Na}^+/\text{Ca}^{2+}$  exchange inhibition occurs spontaneously in the recovering septic hearts, contributing to the increase in  $\text{Ca}_{\text{SR}}$  and  $\Delta\text{Ca}_i$  above baseline levels by day 6. It is currently unknown whether the decrease in  $\text{Na}^+/\text{Ca}^{2+}$  exchange function is the result of a decrease in protein expression or an allosteric inhibition of the  $\text{Na}^+/\text{Ca}^{2+}$  exchange. The identity of the signaling pathways responsible is also unknown.

### $\text{L}$ -Type $\text{Ca}^{2+}$ Channels and Sarcoplasmic Reticulum Fractional Release Are Initially Depressed after LPS and Subsequently Recover

Consistent with our previous findings,<sup>6</sup>  $\Delta\text{Ca}_{\text{entry}}$  via  $\text{L}$ -type  $\text{Ca}^{2+}$  channels was decreased at 12 h after LPS administration (fig. 5),

indicating that  $\text{L}$ -type  $\text{Ca}^{2+}$  channels are down-regulated.  $\text{L}$ -Type  $\text{Ca}^{2+}$  channel down-regulation induced a decrease in sarcoplasmic reticulum fractional release (fig. 4D) at this time point and thus represented a major determinant of the initial decrease in  $\Delta\text{Ca}_i$  after LPS challenge.<sup>6</sup> Importantly, at day 3, both  $\Delta\text{Ca}_{\text{entry}}$  (fig. 5B) and fractional release recovered to baseline levels.

The mechanisms underlying  $\text{L}$ -type  $\text{Ca}^{2+}$  channel recovery are currently unknown. The initial depression in  $\Delta\text{Ca}_{\text{entry}}$  has been associated with a decrease in the expression of the main ( $\alpha 1$ ) channel subunit.<sup>25</sup> As such, it is tempting to speculate that the rapid recovery of  $\text{L}$ -type  $\text{Ca}^{2+}$  channel function after LPS is due to a rapid recovery of channel expression.<sup>26</sup> Alternatively,  $\text{L}$ -type  $\text{Ca}$  channel recovery could also be due to allosteric activation by  $\beta$ -adrenergic<sup>27</sup> or redox<sup>28</sup> signaling.

At day 6,  $\Delta\text{Ca}_{\text{entry}}$  was again depressed, without a decrease in  $\Delta\text{Ca}_i$ . From the principle of autoregulation of cardiomyocyte contractility,<sup>29</sup> one could predict that inhibition of  $\text{Na}^+/\text{Ca}^{2+}$  exchange at day 6 would secondarily lead to a decrease in  $\Delta\text{Ca}_{\text{entry}}$ , because, at steady-state,  $\Delta\text{Ca}_{\text{entry}}$  needs to be equal to the amount of calcium extrusion through the  $\text{Na}^+/\text{Ca}^{2+}$  exchange. This is exactly what we found. Mechanistically,  $\Delta\text{Ca}_{\text{entry}}$  decrease at day 6 may be due to an enhanced  $\text{Ca}^{2+}$ -induced  $\text{Ca}^{2+}$  inactivation,<sup>30</sup> following an increase in  $\text{Ca}^{2+}$  release from the sarcoplasmic reticulum.

### Could $\text{Ca}^{2+}$ Up-regulation Be the Result of Survival Bias?

The majority of experiments presented here used a dose of 7  $\mu\text{g/g}$  of LPS. We chose this dose to ensure that the disease model that we used is sufficiently severe to be clinically relevant, as indicated by the associated mortality. The obvious caveat was that the surviving mice studied were not representative for the entire group of mice enrolled. Could the increase in  $\Delta\text{Ca}_i$  at day 6 be explained by the fact that the mice that survive LPS challenge have an increased  $\Delta\text{Ca}_i$  at baseline compared with mice that died?

Three observations argue against this idea. First, all of the LPS-induced mouse death occurred between 12 h and day 2. Therefore, no mice died between day 3, when  $\Delta\text{Ca}_i$  was similar to baseline, and day 6, when  $\Delta\text{Ca}_i$  was increased from baseline. If the increased  $\Delta\text{Ca}_i$  at day 6 was due to a survival bias, then it should have been seen at day 3 as well. Instead, the ascending trend of  $\Delta\text{Ca}_i$  continued between days 3 and 6, in the absence of any additional mortality. Second, baseline cardiac contractility, measured by echocardiography, was similar between mice that survived LPS challenged and those that died (fig. 6). Third, up-regulation of  $\Delta\text{Ca}_i$  was also observed in a different series of experiments that used a reduced dose of LPS (4  $\mu\text{g/g}$ ) and induced no mortality (see figs. 7 and 8).

### $\text{Ca}^{2+}$ Handling Up-regulation after Challenge with a Dose of 4 $\mu\text{g/g}$ of LPS

A dose of 4  $\mu\text{g/g}$  of LPS induced a significant depression in cardiomyocyte sarcomere shortening, without any changes in  $\Delta\text{Ca}_i$ , indicating that, in these conditions, cardiomyocytes dysfunction is due solely to the dysfunction of myofilaments,

whereas  $\text{Ca}^{2+}$  handling, *per se*, is intact.<sup>18</sup> Importantly, at day 3, both  $\Delta\text{Ca}_i$  and sarcomere shortening were again increased to levels higher than baseline. This observation indicated that myocardial  $\text{Ca}^{2+}$  handling is up-regulated during the recovery phase of sepsis-induced cardiomyopathy in these conditions too. The exact nature of the recovery mechanisms is currently unknown and is likely different from those acting after a dose of 7  $\mu\text{g/g}$  of LPS. First, the peak in  $\Delta\text{Ca}_i$  occurs earlier, at day 3, as compared with day 6 after 7  $\mu\text{g/g}$  of LPS. Second, there is no SERCA inhibition at 12h, nor SERCA activation at day 3, as we found after a challenge with 7  $\mu\text{g/g}$  of LPS. However, the fact that  $\Delta\text{Ca}_i$  is up-regulated in this model also indicates that an intrinsic myocardial recovery mechanism is still present after a dose of 4  $\mu\text{g/g}$ , despite the fact that the initial cardiomyocyte depression occurs through different mechanisms than after challenge with 7  $\mu\text{g/g}$  of LPS.

### Clinical Implications

Currently, it is generally believed that cardiac recovery in surviving patients with sepsis is due to the remission of the inciting inflammatory triggers. A number of observations made here are inconsistent with this idea. First, if this was the case, then  $\Delta\text{Ca}_i$  should have recovered back to baseline levels after its initial decline after LPS administration but should not have overshoot above baseline. Second,  $\Delta\text{Ca}_i$  started to recover at a time point between 12h and day 1, a time window when clinical recovery had not become apparent yet, as evidenced by the ongoing mortality. Third, phospholamban down-regulation and  $\text{Na}^+/\text{Ca}^{2+}$  exchange inhibition are new mechanisms that appear at days 3 and 6, respectively, and do not represent the reversal of the mechanisms responsible for  $\Delta\text{Ca}_i$  depression at 12h. Therefore, these observations forced us to postulate the existence of a myocardial recovery mechanism that underlies sepsis-induced cardiomyopathy resolution, independent of the evolution of systemic inflammation.

If this conclusion is also true for human sepsis, then therapeutic strategies of the future will need to be tailored to avoid interfering with the intrinsic myocardial recovery process in the subacute phase of sepsis and sepsis-induced cardiomyopathy. This task may prove difficult if the same signaling pathways are responsible for the initial  $\Delta\text{Ca}_i$  depression and its subsequent up-regulation.

It is also evident from our study that mouse mortality occurred between 12h and day 2 after LPS administration, while cardiomyocyte function was already recovering. This observation served as a powerful reminder that mortality of septic patients is usually due to multiorgan failure, and the correction of any one deficit (the heart, in our study) is not sufficient to secure survival. Therapeutic strategies of the future will need, therefore, to address all or at least most organ dysfunctions (*e.g.*, the loss of vascular tone and lung and kidney failure) before expecting an improvement in survival rates.

### Assumptions and Limitations

The current study used a simplified model of sepsis-induced cardiomyopathy based on direct challenge with LPS. This model has been shown previously not to correspond to all aspects of clinical sepsis.<sup>31</sup> Therefore, it will be important to confirm and extend these findings in the future using models of sepsis that more faithfully replicate human disease.<sup>32</sup>

In this study we only used male mice. We have found previously that sepsis-induced cardiomyopathy develops through different mechanisms in male and female mice.<sup>33</sup> It remains for the future, therefore, to expand these studies to include female mice.

### Conclusions

This is the first investigation of the cardiac  $\text{Ca}^{2+}$  handling mechanisms during the recovery phase of endotoxemic cardiomyopathy in mice. We show that, after an initial depression, cardiac  $\text{Ca}^{2+}$  handling starts recovering quickly (within 24h), reaches baseline levels by day 3, and is upregulated above baseline by day 6. This observation is inconsistent with the generally held notion that, in septic patients, cardiac dysfunction recovers as a result of the remission of systemic inflammation. Mechanistically,  $\Delta\text{Ca}_i$  recovery is based on phospholamban down-regulation, up-regulation of SERCA, a full recovery of L-type  $\text{Ca}^{2+}$  channel function, and the down-regulation of the  $\text{Na}^+/\text{Ca}^{2+}$  exchange. Identifying the signaling pathways responsible for cardiac recovery in sepsis and turning these insights into novel therapies remain exciting opportunities for the future.

### Acknowledgments

The idea behind this study came during a discussion with the late Kenneth D. Bloch, M.D., Professor of Anesthesiology, Harvard University, Boston, Massachusetts.

### Research Support

Supported by grant Nos. HL-061639 and HL-064750 from the National Institutes of Health, Bethesda, Maryland (to Dr. Colucci); contract No. N01-HV-28178 from the National Heart, Lung, and Blood Institute—sponsored Boston University Cardiovascular Proteomics Center, Boston, Massachusetts (to Dr. Colucci); grant No. K08GM096082 from the National Institute of General Medical Sciences, Bethesda, Maryland, and support from the Department of Anesthesia, Critical Care and Pain Medicine, Massachusetts General Hospital, Boston, Massachusetts (to Dr. Hobai). Other support includes Student Research Awards from Boston University, Boston, Massachusetts (to J. C. Morse).

### Competing Interests

The authors declare no competing interests.

### Correspondence

Address correspondence to Dr. Hobai; Department of Anesthesia, Critical Care and Pain Medicine, Massachusetts

General Hospital, 55 Fruit Street, GRB 444, Boston, Massachusetts 02114. [ihobai@partners.org](mailto:ihobai@partners.org). Information on purchasing reprints may be found at [www.anesthesiology.org](http://www.anesthesiology.org) or on the masthead page at the beginning of this issue. ANESTHESIOLOGY's articles are made freely accessible to all readers, for personal use only, 6 months from the cover date of the issue.

## References

- Rhodes A, Lamb FJ, Malagon I, Newman PJ, Grounds RM, Bennett ED: A prospective study of the use of a dobutamine stress test to identify outcome in patients with sepsis, severe sepsis, or septic shock. *Crit Care Med* 1999; 27:2361–6
- Parker MM, Ognibene FP, Parrillo JE: Peak systolic pressure/end-systolic volume ratio, a load-independent measure of ventricular function, is reversibly decreased in human septic shock. *Crit Care Med* 1994; 22:1955–9
- Ognibene FP, Parker MM, Natanson C, Shelhamer JH, Parrillo JE: Depressed left ventricular performance: Response to volume infusion in patients with sepsis and septic shock. *Chest* 1988; 93:903–10
- Hobai IA, Edgcomb J, LaBarge K, Colucci WS: Dysregulation of intracellular calcium transporters in animal models of sepsis-induced cardiomyopathy. *Shock* 2015; 43:3–15
- Zhong J, Hwang TC, Adams HR, Rubin LJ: Reduced L-type calcium current in ventricular myocytes from endotoxemic guinea pigs. *Am J Physiol* 1997; 273(5 pt 2):H2312–24
- Hobai IA, Buys ES, Morse JC, Edgcomb J, Weiss EH, Armoundas AA, Hou X, Khandelwal AR, Siwik DA, Brouckaert P, Cohen RA, Colucci WS: SERCA Cys<sup>674</sup> sulphonylation and inhibition of L-type Ca<sup>2+</sup> influx contribute to cardiac dysfunction in endotoxemic mice, independent of cGMP synthesis. *Am J Physiol Heart Circ Physiol* 2013; 305:H1189–200
- Zhu X, Bernecker OY, Manohar NS, Hajar RJ, Hellman J, Ichinose F, Valdivia HH, Schmidt U: Increased leakage of sarcoplasmic reticulum Ca<sup>2+</sup> contributes to abnormal myocyte Ca<sup>2+</sup> handling and shortening in sepsis. *Crit Care Med* 2005; 33:598–604
- Ichinose F, Buys ES, Neilan TG, Furutani EM, Morgan JG, Jassal DS, Graveline AR, Searles RJ, Lim CC, Kaneki M, Picard MH, Scherrer-Crosbie M, Janssens S, Liao R, Bloch KD: Cardiomyocyte-specific overexpression of nitric oxide synthase 3 prevents myocardial dysfunction in murine models of septic shock. *Circ Res* 2007; 100:130–9
- Buys ES, Cauwels A, Raheer MJ, Passeri JJ, Hobai I, Cawley SM, Rauwerdink KM, Thibault H, Sips PY, Thoonen R, Scherrer-Crosbie M, Ichinose F, Brouckaert P, Bloch KD: sGC $\alpha$ 1 $\beta$ 1 attenuates cardiac dysfunction and mortality in murine inflammatory shock models. *Am J Physiol Heart Circ Physiol* 2009; 297:H654–63
- Qin F, Siwik DA, Luptak I, Hou X, Wang L, Higuchi A, Weisbrod RM, Ouchi N, Tu VH, Calamaras TD, Miller EJ, Verbeuren TJ, Walsh K, Cohen RA, Colucci WS: The polyphenols resveratrol and S17834 prevent the structural and functional sequelae of diet-induced metabolic heart disease in mice. *Circulation* 2012; 125:1757–64, S1–6
- Uto A, Arai H, Ogawa Y: Reassessment of Fura-2 and the ratio method for determination of intracellular Ca<sup>2+</sup> concentrations. *Cell Calcium* 1991; 12:29–37
- Gryniewicz G, Poenie M, Tsien RY: A new generation of Ca<sup>2+</sup> indicators with greatly improved fluorescence properties. *J Biol Chem* 1985; 260:3440–50
- Krüger M, Linke WA: Titin-based mechanical signalling in normal and failing myocardium. *J Mol Cell Cardiol* 2009; 46:490–8
- Tagawa H, Wang N, Narishige T, Ingber DE, Zile MR, Cooper G IV: Cytoskeletal mechanics in pressure-overload cardiac hypertrophy. *Circ Res* 1997; 80:281–9
- Bhupathy P, Babu GJ, Periasamy M: Sarcolipin and phospholamban as regulators of cardiac sarcoplasmic reticulum Ca<sup>2+</sup> ATPase. *J Mol Cell Cardiol* 2007; 42:903–11
- Bassani JW, Bassani RA, Bers DM: Relaxation in rabbit and rat cardiac cells: species-dependent differences in cellular mechanisms. *J Physiol* 1994; 476:279–93
- Bers DM: Cardiac excitation-contraction coupling. *Nature* 2002; 415:198–205
- Layland J, Cave AC, Warren C, Grieve DJ, Sparks E, Kentish JC, Solaro RJ, Shah AM: Protection against endotoxemia-induced contractile dysfunction in mice with cardiac-specific expression of slow skeletal troponin I. *FASEB J* 2005; 19:1137–9
- Janczewski AM, Zahid M, Lemster BH, Frye CS, Gibson G, Higuchi Y, Kranias EG, Feldman AM, McTiernan CF: Phospholamban gene ablation improves calcium transients but not cardiac function in a heart failure model. *Cardiovasc Res* 2004; 62:468–80
- Luo W, Grupp IL, Harrer J, Ponniah S, Grupp G, Duffy JJ, Doetschman T, Kranias EG: Targeted ablation of the phospholamban gene is associated with markedly enhanced myocardial contractility and loss of beta-agonist stimulation. *Circ Res* 1994; 75:401–9
- Wang X, Yang J, Dong L, Pang Y, Su J, Tang C, Liu N: Alternation of Na<sup>+</sup>-Ca<sup>2+</sup> exchange in rat cardiac sarcolemmal membranes during different phases of sepsis. *Chin Med J (Engl)* 2000; 113:18–21
- Hobai IA, Maack C, O'Rourke B: Partial inhibition of sodium/calcium exchange restores cellular calcium handling in canine heart failure. *Circ Res* 2004; 95:292–9
- Hobai IA, O'Rourke B: The potential of Na<sup>+</sup>/Ca<sup>2+</sup> exchange blockers in the treatment of cardiac disease. *Expert Opin Investig Drugs* 2004; 13:653–64
- Hobai IA, O'Rourke B: Enhanced Ca<sup>2+</sup>-activated Na<sup>+</sup>-Ca<sup>2+</sup> exchange activity in canine pacing-induced heart failure. *Circ Res* 2000; 87:690–8
- Hobai I, Buys E, Weiss E, Armoundas AA, Siwik DA, Brouckaert P, Colucci WS: The dysregulation of cardiac excitation-contraction coupling in endotoxemic mice occurs independently of cGMP. *Biophys J* 2010; 100:180a
- Hsu C, Wu G, Yang SL, Hsu HK, Yang RC, Tang C, Liu MS: Intracellular redistribution of dihydropyridine receptor in the rat heart during the progression of sepsis. *J Surg Res* 2007; 141:146–52
- Kamp TJ, Hell JW: Regulation of cardiac L-type calcium channels by protein kinase A and protein kinase C. *Circ Res* 2000; 87:1095–102
- Hool LC: The L-type Ca<sup>2+</sup> channel as a potential mediator of pathology during alterations in cellular redox state. *Heart Lung Circ* 2009; 18:3–10
- Eisner DA, Trafford AW, Díaz ME, Overend CL, O'Neill SC: The control of Ca release from the cardiac sarcoplasmic reticulum: regulation *versus* autoregulation. *Cardiovasc Res* 1998; 38:589–604
- Peterson BZ, Lee JS, Mülle JG, Wang Y, de Leon M, Yue DT: Critical determinants of Ca<sup>2+</sup>-dependent inactivation within an EF-hand motif of L-type Ca<sup>2+</sup> channels. *Biophys J* 2000; 78:1906–20
- Remick DG, Ward PA: Evaluation of endotoxin models for the study of sepsis. *Shock* 2005; 24(suppl 1):7–11
- Hubbard WJ, Choudhry M, Schwacha MG, Kerby JD, Rue LW 3<sup>rd</sup>, Bland KI, Chaudry IH: Cecal ligation and puncture. *Shock* 2005; 24(suppl 1):52–7
- Hobai IA, Aziz K, Buys ES, Brouckaert P, Siwik DA, Colucci WS: Distinct myocardial mechanisms underlie cardiac dysfunction in endotoxemic male and female mice. *Shock* 2016; 46:713–22
